# Supplementary material for: Evolution of fluvial meander-belt deposits and implications for the completeness of the stratigraphic record
Source: Oxford University Press journal article supplement (doi:10.1130/b31699.1), 2017-12-20
Supplement: 2017379_tablesd1.xlsx [file 2017379_tablesd1.xlsx]

## Sheet: NAYS2D_AP
Stage	AP	Migrated Area (km2)	Preserved Area (km2)	Preserved Percent
1	A	0.026	0.014	0.536
2	C	0.071	0.041	0.578
3	F	0.042	0.034	0.811
4	I	0.031	0.03	0.969
6	S	0.064	0.047	0.738
7	d	0.032	0.024	0.745
8	n	0.043	0.029	0.678
9	x	0.064	0.05	0.778
10	II	0.091	0.049	0.541
11	TT	0.062	0.042	0.679
12	ff	0.024	0.023	0.971
13	ss	0.073	0.056	0.775
1	B	0.09	0.045	0.505
2	D	0.14	0.081	0.575
3	G	0.147	0.1	0.687
4	J	0.124	0.092	0.74
2	E	0.106	0	0
3	H	0.054	0	0
4	K	0.019	0	0
6	R	0.039	0.019	0.5
7	c	0.037	0.028	0.554
8	m	0.057	0.044	0.777
9	w	0.047	0.034	0.719
10	HH	0.015	0.006	0.408
12	ee	0.01	0.007	0.706
13	rr	0.033	0.031	0.934
14	DDD	0.007	0.007	1
15	PPP	0.024	0.021	0.875
16	ddd	0.024	0.024	1
14	EEE	0.051	0.044	0.861
15	SSS	0.031	0.031	1
16	eee	0.021	0.021	1
5	M	0.1	0.026	0.256
6	T	0.099	0.089	0.894
7	e	0.05	0.046	0.911
8	o	0.022	0.021	0.95
9	y	0.016	0.011	0.682
10	JJ	0.039	0.038	0.95
11	UU	0.1	0.039	0.392
12	gg	0.063	0.019	0.302
13	tt	0.049	0.005	0.105
5	N	0.169	0.06	0.366
6	V	0.04	0.036	0.898
7	f	0.011	0.011	0.969
8	p	0.029	0.025	0.877
9	z	0.016	0.012	0.763
10	KK	0.045	0.019	0.414
12	UUU	0.012	0.005	0.417
13	ggg	0.025	0.025	1
5	N	0.169	0.06	0.366
6	U	0.022	0.022	1
14	FFF	0.022	0.021	0.944
15	TTT	0.106	0.103	0.97
16	fff	0.049	0.049	1
4	L	0.163	0.009	0.054
5	O	0.03	0.029	0.975
6	W	0.026	0.016	0.612
7	g	0.032	0.03	0.959
8	q	0.01	0.038	0.387
9	AA	0.016	0.012	0.761
10	LL	0.037	0.022	0.587
11	WW	0.012	0.01	0.818
12	ii	0.085	0.085	1
13	vv	0.123	0.112	0.91
14	HHH	0.092	0.059	0.643
15	VVV	0.087	0.064	0.733
16	hhh	0.057	0.057	1
5	P	0.137	0.114	0.834
6	Y	0.057	0.045	0.775
7	h	0.123	0.072	58.2
8	r	0.091	0.087	0.95
9	BB	0.08	0.01	0.12
10	MM	0.028	0.002	0.077
12	jj	0.045	0.038	0.844
13	ww	0.166	0.115	0.691
14	III	0.118	0.099	0.841
15	WWW	0.043	0.029	0.671
16	iii	0.057	0.057	1
16	jjj	0.011	0.011	1
6	Z	0.09	0.073	0.81
7	i	0.022	0.019	0.835
8	s	0.187	0.065	0.349
9	CC	0.095	0.084	0.884
10	NN	0.064	0.056	0.863
11	YY	0.101	0.078	0.765
12	kk	0.104	0.079	0.759
13	xx	0.052	0.046	0.886
14	JJJ	0.017	0.014	0.814
15	XXX	0.093	0.086	0.933
16	kkk	0.029	0.029	1
5	Q	0.108	0.057	0.527
6	a	0.124	0.114	0.914
7	j	0.079	0.065	0.821
9	DD	0.046	0.04	0.877
10	OO	0.231	0.199	0.86
11	ZZ	0.101	0.078	0.765
12	ll	0.024	0.024	1
12	mm	0.113	0.079	0.697
13	yy	0.098	0.09	0.923
14	KKK	0.089	0.088	0.987
15	YYY	0.053	0.048	0.909
16	lll	0.069	0.069	1
6	b	0.101	0.013	0.124
7	k	0.085	0.03	0.357
8	t	0.187	0.065	0.349
9	EE	0.067	0.018	0.293
10	PP	0.121	0.078	0.646
11	aa	0.158	0.08	0.503
12	nn	0.042	0.042	1
13	zz	0.174	0.129	0.746
14	LLL	0.131	0.103	0.79
15	ZZZ	0.103	0.103	0.996
16	mmm	0.145	0.145	1
11	cc	0.023	0.023	1
12	oo	0.059	0.041	0.694
13	AAA	0.05	0.05	1
14	MMM	0.154	0.146	0.948
15	aaa	0.062	0.062	1
16	nnn	0.046	0.046	1
7	l	0.086	0.006	0.072
8	u	0.145	0.088	0.606
9	FF	0.095	0.077	0.811
10	QQ	0.094	0.091	0.967
11	bb	0.178	0.154	0.861
8	v	0.092	0.0008	0.001
9	dd	0.043	0.025	0.577
10	pp	0.112	0.051	0.46
11	BBB	0.144	0.107	0.745
12	NNN	0.129	0.127	0.986
13	bbb	0.172	0.171	0.993
14	ooo	0.106	0.106	1
12	qq	0.026	0.026	1
13	CCC	0.042	0.0416	0.988
14	OOO	0.107	0.094	0.878
15	ccc	0.046	0.046	1
16	ppp	0.056	0.056	1

## Sheet: NAYS2D_Bar
Stages	Bar	Migrated Area (km2)	Preserved Area (km2)	Preserved Percent
1 - 16	2	0.462	0.319	0.690223
7 - 16	14	0.448	0.415	0.926541
5 - 16	10	0.615	0.577	0.937667

## Sheet: NAYS2D_MB
Stages	Meander Belt	Migrated Area (km2)	Preserved Area (km2)	Preserved Percent
1 -16	T=293	0.116	0.059	0.511691
2 -16	T=318	0.43	0.181	0.421655
3 -16	T=343	0.643	0.316	0.491151
4 -16	T=368	0.848	0.446	0.526239
5 -16	T=393	1.16	0.704	0.6066
6 -16	T=418	1.744	1.168	0.67
7 -16	T=443	2.224	1.492	0.6708
8 -16	T=468	2.858	1.871	0.6548
9 -16	T=493	3.305	2.221	0.672
10 -16	T=518	3.9	2.78	0.7128
11 -16	T=543	4.362	3.246	0.7442
12 -16	T=568	4.712	3.761	0.7982
13 -16	T=593	5.481	4.545	0.8292
14 -16	T=618	6.006	5.349	0.8906
15 -16	T=643	6.471	6.121	0.9458
16 -16	T=668	6.815	6.815	1

## Sheet: Helena_AP
Stage	AP	Migrated Area (km2)	Preserved Area (km2)	Preserved Percent
4	A	21.9	9.4	0.43
5	B	10	10	1
4	C	30.7	0	0
5	D	1	1	1
4	E	6.4	0	0
5	F	5	0	0
6	G	4.3	0	0
7	H	8.2	0	0
8	I	9.1	0	0
6	J	48.4	0	0
7	K	7	2.3	0.328
6	L	11.4	0	0
7	M	4.8	0	0
8	N	23.9	0	0
9	O	3.9	0.8	0.199
10	P	18.1	4.2	0.231
11	Q	7.9	7.9	0.992
7	R	12.6	0	0
8	S	14.9	0	0
9	T	14.6	0.3	0.018
10	U	15.1	1.6	0.106
11	V	23.6	3.2	0.137
12	W	8	8	1
7	X	6	4	0.659
8	Y	7.3	7	0.954
9	Z	11.9	6.2	0.522
10	a	17.9	6.2	0.348
11	b	8.9	7.7	0.862
10	c	9.5	2	0.21
11	d	3.3	3.2	0.955
10	e	26.3	1.7	0.063
11	f	23	0	0
11	g	27.8	4.3	0.154
12	h	6.3	0	0
13	i	4.2	0.1	0.024
12	j	4.2	0	0
13	k	3.4	0	0
14	l	23.4	2.2	0.095
15	m	3.5	2.1	0.608
12	n	20.7	3.2	0.156
13	o	2.4	0.5	0.199
14	p	1.7	0	0
12	q	7.3	0.6	0.093
13	r	6.5	1.9	0.299
13	s	9.7	2.5	0.258
14	t	6.7	1.8	0.274
15	u	8.9	2.6	0.288
16	v	11.2	2.2	0.192
14	w	2.6	0	0
15	x	17.4	3.1	0.181
15	y	8.7	6.6	0.768
16	z	5.7	3	0.533
15	AA	1.2	0.1	0.098
16	BB	7.3	1.3	0.171

## Sheet: Helena_Bar
Stages	Bar	Migrated Area (km2)	Preserved Area (km2)	Preserved Percent
4 - 19	1	21.1	10	0.4737
4 - 19	2	12.4	5	0.401
4 - 19	3	28.1	4.9	0.1729
6 - 19	4	32.8	2.1	0.0653
6 - 19	5	13.9	13.2	0.9506
7 - 19	6	30.2	13.8	0.4557
7 - 19	7	12.2	10.9	0.894
9 - 19	8	28.3	20.8	0.7329
10 - 19	9	12.8	6.6	0.515
10 - 19	10	27.2	2.9	0.1068
11 - 19	11	28	4.2	0.1518
12 - 19	12	9.1	0	0
12 - 19	13	29.4	4.4	0.1488
12 - 19	14	37.3	4.3	0.115
12 - 19	15	10.3	2.1	0.2014
13 - 19	16	30.5	12.3	0.4027
14 - 19	17	18.8	3.1	0.164
15 - 16	18	13.7	9.5	0.6918
15 - 19	19	8.5	0.1	0.0136

## Sheet: Helena_MB
Stages	Meander Belt	Migrated Area (km2)	Preserved Area (km2)	Preserved Percent
4 -19	Stage 4	59.1	13	0.2207
5 -19	Stage 5	90.4	19.8	0.219
6 -19	Stage 6	109	19.8	0.1817
7 -19	Stage 7	101.4	25.9	0.2552
8 -19	Stage 8	138.9	33.1	0.2381
9 -19	Stage 9	121.2	40.8	0.3365
10 -19	Stage 10	171.9	58.1	0.3379
11 -19	Stage 11	196.5	89.9	0.4576
12 -19	Stage 12	201.9	101.7	0.5038
13 -19	Stage 13	200.3	105.1	0.525
14 -19	Stage 14	208.5	107.4	0.5151
15 -19	Stage 15	224.3	121.9	0.5434
16 -19	Stage 16	213.6	133.6	0.6256

## Sheet: McMurray_AP
Stage	AP	Migrated Area (km2)	Preserved Area (km2)	Preserved Percent
1	A	6.7	0	0
2	E	10.8	0.5	0.045
3	I	8.4	7.7	0.912
1	B	8	1.9	0.241
2	F	7.9	3	0.377
3	J	11.4	9.3	0.817
4	N	20.4	13.4	0.654
5	S	10.2	7.8	0.768
1	C	3.7	0.13	0.036
2	G	11.1	3.6	0.325
3	K	10.3	3.2	0.306
4	O	14.3	6.1	0.427
5	U	6.7	6.7	1
1	D	8	4.1	0.51
2	H	9.1	4.8	0.531
3	L	12.9	2.9	0.225
4	P	16.6	5	0.305
3	Q	2.7	2.7	1
4	R	4.1	4.1	1
5	T	0.3	0.3	1
4	M	9	3.9	0.438
5	V	10.9	9.7	0.895
5	W	1.2	0.6	0.48
6	Z	7.6	6.3	0.828
7	d	7.6	3.9	0.51
8	n	16.7	2.5	0.151
9	u	5.1	0	0
10	BB	1	0	0
5	X	4.1	0	0
6	a	12	3	0.248
7	e	11	9.1	0.823
8	o	7.7	7.7	1
5	Y	3.8	0	0
6	b	8.4	6.9	0.817
7	f	10.3	10.3	1
6	c	10.5	3.6	0.344
7	g	9	8.7	0.971
8	p	20.8	10.5	0.505
7	h	8.6	1.5	0.173
8	q	6	3.9	0.25
9	w	10.6	9.8	0.931
7	i	7.3	3.7	0.511
8	r	12.2	3	0.25
9	x	5.4	5.3	0.971
4	j	6.9	1.2	0.178
5	k	9.2	0	0
6	l	5.9	0	0
7	m	11.9	0.6	0.054
8	s	8.2	3.1	0.378
9	y	9.1	5.7	0.625
10	CC	10	9.2	0.925
11	GG	10	10	1
8	t	3.9	2.1	0.545
9	z	9.9	5.6	0.558
10	DD	11.7	3.7	0.321
11	FF	9.1	8.1	0.886
9	AA	9.4	7.7	0.82
10	EE	9.8	9.8	1
9	v	10.1	4.9	0.482
10	HH	8.1	7.7	0.952

## Sheet: McMurray_Bar
Stages	Bar	Migrated Area (km2)	Preserved Area (km2)	Preserved Percent
1 - 12	1	20.1	8.2	0.4047
1 - 12	2	23.3	26.1	0.8072
1 - 12	3	19.7	19.7	1
1 - 12	4	41.5	16.9	0.4079
3 - 12	5	9.9	9.9	1
4 - 12	6	16.2	13.7	0.8418
5 - 12	7	32.4	13.3	0.4097
5 - 12	8	20.8	19.8	0.9486
5 - 12	9	18.1	17.2	0.9463
6 - 12	10	37.4	22.8	0.6112
7 - 12	11	18	15.2	0.8465
7 - 12	12	15	12.1	0.8049
4 - 12	13	23.6	1.9	0.0794
8 - 12	14	27.9	27.9	1
8 - 12	15	24.1	19.4	0.8061
9 - 12	16	17.5	17.5	1
9 - 12	17	16	12.6	0.784

## Sheet: McMurray_MB
Stages	Meander Belt	Migrated Area (km2)	Preserved Area (km2)	Preserved Percent
1 - 12	1	26.4	6.2	0.2333
2 - 12	2	58.3	18.1	0.31
3 - 12	3	93.1	43.8	0.4708
4 - 12	4	151.1	77.6	0.5133
5 - 12	5	162.4	105.6	0.6404
6 - 12	6	194.7	125.4	0.6438
7 - 12	7	230.6	163.2	0.7075
8 - 12	8	274.5	196	0.7141
9 - 12	9	297.5	234.9	0.7895
10 - 12	10	312.4	265.4	0.8497
11 - 12	11	293.2	283.4	0.9668
