# Supplementary material for: Evolution of fluvial meander-belt deposits and implications for the completeness of the stratigraphic record
Source: Oxford University Press journal article supplement (doi:10.1130/b31699.1), 2017-12-20
Supplement: 2017379_tablesd2.xlsx [file 2017379_tablesd2.xlsx]

## Sheet: NAYS2D_AP
		RMS Err	R
		0.298286	0.466726
		m	R^2
		-0.186664	0.217833
Stage (Normalized)	Preservation %	Fit
1	1	1
2	1	0.870615
3	0.891718	0.794929
4	0.773911	0.741229
5	0.535721	0.699576
6	0.535721	0.665544
7	0.535721	0.636769
8	0.535721	0.611844
9	0.535721	0.589858
10	0.535721	0.570191
11	0.535721	0.5524
12	0.535721	0.536158
13	0.535721	0.521217
14	0.535721	0.507384
15	0.535721	0.494506
16	0.535721	0.482459
1	1	1
2	0.953084	0.870615
3	0.885383	0.794929
4	0.796103	0.741229
5	0.790747	0.699576
6	0.765528	0.665544
7	0.74035	0.636769
8	0.74035	0.611844
9	0.70822	0.589858
10	0.684218	0.570191
11	0.585954	0.5524
12	0.504802	0.536158
13	0.504802	0.521217
14	0.504802	0.507384
15	0.504802	0.494506
16	0.504802	0.482459
1	1	1
2	0.802693	0.870615
3	0.709809	0.794929
4	0.577517	0.741229
5	0.577517	0.699576
6	0.577517	0.665544
7	0.577517	0.636769
8	0.577517	0.611844
9	0.577517	0.589858
10	0.577517	0.570191
11	0.577517	0.5524
12	0.577517	0.536158
13	0.577517	0.521217
14	0.577517	0.507384
15	0.577517	0.494506
1	1	1
2	0.957294	0.870615
3	0.902514	0.794929
4	0.894235	0.741229
5	0.860524	0.699576
6	0.816239	0.665544
7	0.806607	0.636769
8	0.773038	0.611844
9	0.71513	0.589858
10	0.633341	0.570191
11	0.575124	0.5524
12	0.575124	0.536158
13	0.575124	0.521217
14	0.575124	0.507384
15	0.575124	0.494506
1	1	1
2	0.995139	0.870615
3	0.396619	0.794929
4	0.0997039	0.741229
5	0	0.699576
6	0	0.665544
7	0	0.636769
8	0	0.611844
9	0	0.589858
10	0	0.570191
11	0	0.5524
12	0	0.536158
13	0	0.521217
14	0	0.507384
15	0	0.494506
1	1	1
2	0.893878	0.870615
3	0.811018	0.794929
4	0.811018	0.741229
5	0.811018	0.699576
6	0.811018	0.665544
7	0.811018	0.636769
8	0.811018	0.611844
9	0.811018	0.589858
10	0.811018	0.570191
11	0.811018	0.5524
12	0.811018	0.536158
13	0.811018	0.521217
14	0.811018	0.507384
1	1	1
2	0.950247	0.870615
3	0.950247	0.794929
4	0.950247	0.741229
5	0.948827	0.699576
6	0.945413	0.665544
7	0.937733	0.636769
8	0.896039	0.611844
9	0.817597	0.589858
10	0.731364	0.570191
11	0.687268	0.5524
12	0.687268	0.536158
13	0.687268	0.521217
14	0.687268	0.507384
1	1	1
2	0.426031	0.870615
3	0.00374299	0.794929
4	0	0.741229
5	0	0.699576
6	0	0.665544
7	0	0.636769
8	0	0.611844
9	0	0.589858
10	0	0.570191
11	0	0.5524
12	0	0.536158
13	0	0.521217
14	0	0.507384
1	1	1
2	0.969093	0.870615
3	0.969093	0.794929
4	0.969093	0.741229
5	0.969093	0.699576
6	0.969093	0.665544
7	0.969093	0.636769
8	0.969093	0.611844
9	0.969093	0.589858
10	0.969093	0.570191
11	0.969093	0.5524
12	0.969093	0.536158
13	0.969093	0.521217
1	1	1
2	0.990609	0.870615
3	0.955921	0.794929
4	0.933476	0.741229
5	0.925593	0.699576
6	0.91734	0.665544
7	0.88026	0.636769
8	0.82566	0.611844
9	0.772478	0.589858
10	0.739648	0.570191
11	0.739648	0.5524
12	0.739648	0.536158
13	0.739648	0.521217
1	1	1
2	0	0.870615
3	0	0.794929
4	0	0.741229
5	0	0.699576
6	0	0.665544
7	0	0.636769
8	0	0.611844
9	0	0.589858
10	0	0.570191
11	0	0.5524
12	0	0.536158
13	0	0.521217
1	1	1
2	0.168677	0.870615
3	0.157203	0.794929
4	0.155149	0.741229
5	0.134715	0.699576
6	0.108343	0.665544
7	0.0834419	0.636769
8	0.0788008	0.611844
9	0.0540944	0.589858
10	0.0540944	0.570191
11	0.0540944	0.5524
12	0.0540944	0.536158
13	0.0540944	0.521217
1	1	1
2	1	0.870615
3	0.914826	0.794929
4	0.826502	0.741229
5	0.690162	0.699576
6	0.483714	0.665544
7	0.483714	0.636769
8	0.40199	0.611844
9	0.368497	0.589858
10	0.318059	0.570191
11	0.267694	0.5524
12	0.25614	0.536158
1	1	1
2	0.632176	0.870615
3	0.573081	0.794929
4	0.556615	0.741229
5	0.486765	0.699576
6	0.46013	0.665544
7	0.415935	0.636769
8	0.402053	0.611844
9	0.370054	0.589858
10	0.360069	0.570191
11	0.356386	0.5524
12	0.356386	0.536158
1	1	1
2	0.979712	0.870615
3	0.979712	0.794929
4	0.979712	0.741229
5	0.979712	0.699576
6	0.979712	0.665544
7	0.974517	0.636769
8	0.974517	0.611844
9	0.974517	0.589858
10	0.974517	0.570191
11	0.974517	0.5524
1	1	1
2	1	0.870615
3	1	0.794929
4	1	0.741229
5	1	0.699576
6	1	0.665544
7	1	0.636769
8	0.983128	0.611844
9	0.9778	0.589858
10	0.9778	0.570191
11	0.951198	0.5524
12	0.834142	0.536158
1	1	1
2	0.861631	0.870615
3	0.832787	0.794929
4	0.82071	0.741229
5	0.744442	0.699576
6	0.656563	0.665544
7	0.550865	0.636769
8	0.550865	0.611844
9	0.550865	0.589858
10	0.550865	0.570191
11	0.538875	0.5524
12	0.526886	0.536158
1	1	1
2	0.964435	0.870615
3	0.822453	0.794929
4	0.727407	0.741229
5	0.685794	0.699576
6	0.631251	0.665544
7	0.616744	0.636769
8	0.589471	0.611844
9	0.571067	0.589858
10	0.549254	0.570191
11	0.499621	0.5524
1	1	1
2	0.989805	0.870615
3	0.938782	0.794929
4	0.896043	0.741229
5	0.872763	0.699576
6	0.854453	0.665544
7	0.818361	0.636769
8	0.78799	0.611844
9	0.78799	0.589858
10	0.781631	0.570191
11	0.738031	0.5524
1	1	1
2	0.97855	0.870615
3	0.96167	0.794929
4	0.96167	0.741229
5	0.927896	0.699576
6	0.927896	0.665544
7	0.927896	0.636769
8	0.927896	0.611844
9	0.912214	0.589858
10	0.904497	0.570191
11	0.894295	0.5524
1	1	1
2	1	0.870615
3	1	0.794929
4	1	0.741229
5	1	0.699576
6	1	0.665544
7	1	0.636769
8	1	0.611844
9	1	0.589858
10	1	0.570191
11	1	0.5524
1	1	1
2	0.98033	0.870615
3	0.98033	0.794929
4	0.957232	0.741229
5	0.957232	0.699576
6	0.94935	0.665544
7	0.94935	0.636769
8	0.94935	0.611844
9	0.94935	0.589858
10	0.921674	0.570191
11	0.898111	0.5524
1	1	1
2	0.948438	0.870615
3	0.824477	0.794929
4	0.702801	0.741229
5	0.643237	0.699576
6	0.643237	0.665544
7	0.612328	0.636769
8	0.612328	0.611844
9	0.612328	0.589858
10	0.612328	0.570191
11	0.612328	0.5524
1	1	1
2	0.158341	0.870615
3	0.158341	0.794929
4	0.158341	0.741229
5	0.158341	0.699576
6	0.158341	0.665544
7	0.158341	0.636769
8	0.158341	0.611844
9	0.158341	0.589858
10	0.158341	0.570191
11	0.158341	0.5524
1	1	1
2	1	0.870615
3	1	0.794929
4	1	0.741229
5	1	0.699576
6	0.996077	0.665544
7	0.789628	0.636769
8	0.775297	0.611844
9	0.775297	0.589858
10	0.775297	0.570191
11	0.775297	0.5524
1	1	1
2	0.890635	0.870615
3	0.890635	0.794929
4	0.890635	0.741229
5	0.890635	0.699576
6	0.81193	0.665544
7	0.809517	0.636769
8	0.809517	0.611844
9	0.809517	0.589858
10	0.809517	0.570191
11	0.809517	0.5524
1	1	1
2	0.93761	0.870615
3	0.921709	0.794929
4	0.921709	0.741229
5	0.921709	0.699576
6	0.921709	0.665544
7	0.921709	0.636769
8	0.921709	0.611844
9	0.921709	0.589858
10	0.921709	0.570191
11	0.913792	0.5524
1	1	1
2	0.97742	0.870615
3	0.97742	0.794929
4	0.960264	0.741229
5	0.950603	0.699576
6	0.950603	0.665544
7	0.765051	0.636769
8	0.261517	0.611844
9	0.193696	0.589858
10	0.124275	0.570191
1	1	1
2	0.962834	0.870615
3	0.883841	0.794929
4	0.824103	0.741229
5	0.761511	0.699576
6	0.715239	0.665544
7	0.688157	0.636769
8	0.654411	0.611844
9	0.642335	0.589858
10	0.553628	0.570191
1	1	1
2	0.955945	0.870615
3	0.913139	0.794929
4	0.898806	0.741229
5	0.827062	0.699576
6	0.805991	0.665544
7	0.779287	0.636769
8	0.779287	0.611844
9	0.76883	0.589858
10	0.745377	0.570191
1	1	1
2	0.975959	0.870615
3	0.975959	0.794929
4	0.96569	0.741229
5	0.96569	0.699576
6	0.945972	0.665544
7	0.939895	0.636769
8	0.918012	0.611844
9	0.918012	0.589858
10	0.91111	0.570191
1	1	1
2	1	0.870615
3	1	0.794929
4	1	0.741229
5	1	0.699576
6	1	0.665544
7	1	0.636769
8	1	0.611844
9	1	0.589858
10	0.969489	0.570191
1	1	1
2	0.959141	0.870615
3	0.959141	0.794929
4	0.959141	0.741229
5	0.959141	0.699576
6	0.959141	0.665544
7	0.959141	0.636769
8	0.959141	0.611844
9	0.959141	0.589858
10	0.959141	0.570191
1	1	1
2	0.89887	0.870615
3	0.884253	0.794929
4	0.843501	0.741229
5	0.828853	0.699576
6	0.780612	0.665544
7	0.7539	0.636769
8	0.7539	0.611844
9	0.671855	0.589858
10	0.582035	0.570191
1	1	1
2	1	0.870615
3	0.898405	0.794929
4	0.898405	0.741229
5	0.834596	0.699576
6	0.834596	0.665544
7	0.834596	0.636769
8	0.834596	0.611844
9	0.834596	0.589858
10	0.834596	0.570191
1	1	1
2	0.836666	0.870615
3	0.836666	0.794929
4	0.836666	0.741229
5	0.836666	0.699576
6	0.836666	0.665544
7	0.836666	0.636769
8	0.836666	0.611844
9	0.836666	0.589858
10	0.820731	0.570191
1	1	1
2	1	0.870615
3	1	0.794929
4	0.962151	0.741229
5	0.942982	0.699576
6	0.942982	0.665544
7	0.575796	0.636769
8	0.431472	0.611844
9	0.389018	0.589858
10	0.35687	0.570191
1	1	1
2	0.842386	0.870615
3	0.642406	0.794929
4	0.372274	0.741229
5	0.162477	0.699576
6	0.162477	0.665544
7	0.162477	0.636769
8	0.125913	0.611844
9	0.0719383	0.589858
10	0.0719383	0.570191
1	1	1
2	0.959172	0.870615
3	0.935363	0.794929
4	0.91359	0.741229
5	0.873278	0.699576
6	0.865977	0.665544
7	0.832476	0.636769
8	0.832476	0.611844
9	0.777086	0.589858
1	1	1
2	0.883848	0.870615
3	0.8798	0.794929
4	0.770267	0.741229
5	0.756939	0.699576
6	0.733428	0.665544
7	0.725821	0.636769
8	0.710637	0.611844
9	0.677727	0.589858
1	1	1
2	1	0.870615
3	1	0.794929
4	1	0.741229
5	1	0.699576
6	1	0.665544
7	0.960372	0.636769
8	0.960372	0.611844
9	0.94996	0.589858
1	1	1
2	0.956722	0.870615
3	0.956722	0.794929
4	0.956722	0.741229
5	0.956722	0.699576
6	0.919479	0.665544
7	0.890349	0.636769
8	0.890349	0.611844
9	0.877237	0.589858
1	1	1
2	0.667562	0.870615
3	0.387432	0.794929
4	0.387432	0.741229
5	0.387432	0.699576
6	0.387432	0.665544
7	0.387432	0.636769
8	0.387432	0.611844
9	0.387432	0.589858
1	1	1
2	1	0.870615
3	0.98256	0.794929
4	0.963448	0.741229
5	0.958869	0.699576
6	0.958869	0.665544
7	0.954949	0.636769
8	0.954949	0.611844
9	0.949645	0.589858
1	1	1
2	0.662494	0.870615
3	0.607081	0.794929
4	0.433433	0.741229
5	0.433433	0.699576
6	0.433433	0.665544
7	0.433433	0.636769
8	0.433433	0.611844
9	0.433433	0.589858
1	1	1
2	0.949893	0.870615
3	0.896399	0.794929
4	0.889458	0.741229
5	0.645857	0.699576
6	0.498936	0.665544
7	0.387635	0.636769
8	0.362361	0.611844
9	0.348977	0.589858
1	1	1
2	0.92985	0.870615
3	0.708834	0.794929
4	0.608296	0.741229
5	0.608296	0.699576
6	0.608296	0.665544
7	0.608296	0.636769
8	0.605733	0.611844
9	0.605733	0.589858
1	1	1
2	1	0.870615
3	0.616589	0.794929
4	0.616589	0.741229
5	0.616589	0.699576
6	0.394854	0.665544
7	0.0494234	0.636769
8	0.0179361	0.611844
9	0.00876753	0.589858
1	1	1
2	0.954408	0.870615
3	0.919225	0.794929
4	0.802601	0.741229
5	0.802601	0.699576
6	0.741302	0.665544
7	0.741302	0.636769
8	0.718961	0.611844
1	1	1
2	0.991039	0.870615
3	0.916853	0.794929
4	0.897205	0.741229
5	0.866327	0.699576
6	0.845011	0.665544
7	0.81827	0.636769
8	0.778196	0.611844
1	1	1
2	0.828908	0.870615
3	0.828908	0.794929
4	0.828908	0.741229
5	0.828908	0.699576
6	0.697413	0.665544
7	0.697413	0.636769
8	0.681571	0.611844
1	1	1
2	1	0.870615
3	1	0.794929
4	1	0.741229
5	0.788603	0.699576
6	0.780419	0.665544
7	0.780419	0.636769
8	0.76298	0.611844
1	1	1
2	0.853649	0.870615
3	0.790646	0.794929
4	0.771315	0.741229
5	0.761116	0.699576
6	0.761116	0.665544
7	0.761116	0.636769
8	0.761116	0.611844
1	1	1
2	0.67773	0.870615
3	0.642966	0.794929
4	0.190334	0.741229
5	0.190334	0.699576
6	0.119578	0.665544
7	0.119578	0.636769
8	0.119578	0.611844
1	1	1
2	0.968413	0.870615
3	0.884269	0.794929
4	0.884269	0.741229
5	0.884269	0.699576
6	0.884269	0.665544
7	0.884269	0.636769
8	0.884269	0.611844
1	1	1
2	0.950368	0.870615
3	0.923343	0.794929
4	0.893346	0.741229
5	0.893346	0.699576
6	0.893346	0.665544
7	0.893346	0.636769
8	0.876715	0.611844
1	1	1
2	0.978716	0.870615
3	0.978716	0.794929
4	0.679806	0.741229
5	0.650545	0.699576
6	0.416554	0.665544
7	0.339198	0.636769
8	0.293264	0.611844
1	1	1
2	0.840044	0.870615
3	0.811039	0.794929
4	0.811039	0.741229
5	0.811039	0.699576
6	0.811039	0.665544
7	0.811039	0.636769
8	0.811039	0.611844
1	1	1
2	1	0.870615
3	1	0.794929
4	0.57053	0.741229
5	0.104035	0.699576
6	0	0.665544
7	0	0.636769
8	0	0.611844
1	1	1
2	0.674986	0.870615
3	0.470057	0.794929
4	0.438442	0.741229
5	0.408396	0.699576
6	0.408396	0.665544
7	0.408396	0.636769
1	1	1
2	0.700125	0.870615
3	0.684581	0.794929
4	0.654027	0.741229
5	0.608333	0.699576
6	0.562295	0.665544
7	0.541844	0.636769
1	1	1
2	1	0.870615
3	0.97867	0.794929
4	0.969299	0.741229
5	0.950331	0.699576
6	0.950331	0.665544
7	0.950331	0.636769
1	1	1
2	0.858472	0.870615
3	0.837824	0.794929
4	0.668992	0.741229
5	0.668992	0.699576
6	0.668992	0.665544
7	0.414238	0.636769
1	1	1
2	0.71975	0.870615
3	0.593798	0.794929
4	0.587193	0.741229
5	0.587193	0.699576
6	0.587193	0.665544
7	0.587193	0.636769
1	1	1
2	0.0946747	0.870615
3	0.0946747	0.794929
4	0.0946747	0.741229
5	0.0774492	0.699576
6	0.0774492	0.665544
7	0.0774492	0.636769
1	1	1
2	0.927834	0.870615
3	0.863264	0.794929
4	0.863264	0.741229
5	0.863264	0.699576
6	0.863264	0.665544
7	0.863264	0.636769
1	1	1
2	0.930301	0.870615
3	0.924799	0.794929
4	0.88953	0.741229
5	0.876967	0.699576
6	0.874556	0.665544
7	0.859694	0.636769
1	1	1
2	0.988618	0.870615
3	0.690412	0.794929
4	0.690412	0.741229
5	0.678325	0.699576
6	0.656796	0.665544
7	0.645464	0.636769
1	1	1
2	0.966526	0.870615
3	0.966526	0.794929
4	0.966526	0.741229
5	0.966526	0.699576
6	0.966526	0.665544
7	0.966526	0.636769
1	1	1
2	0.91082	0.870615
3	0.713281	0.794929
4	0.465421	0.741229
5	0.398466	0.699576
6	0.00520703	0.665544
7	0	0.636769
1	1	1
2	0.633881	0.870615
3	0.184633	0.794929
4	0	0.741229
5	0	0.699576
6	0	0.665544
1	1	1
2	0.902787	0.870615
3	0.871004	0.794929
4	0.79288	0.741229
5	0.703556	0.699576
6	0.678863	0.665544
1	1	1
2	0.883948	0.870615
3	0.663478	0.794929
4	0.426739	0.741229
5	0.418345	0.699576
6	0.391731	0.665544
1	1	1
2	1	0.870615
3	1	0.794929
4	1	0.741229
5	1	0.699576
6	0.176393	0.665544
1	1	1
2	0.817456	0.870615
3	0.817456	0.794929
4	0.817456	0.741229
5	0.817456	0.699576
6	0.817456	0.665544
1	1	1
2	0.0337637	0.870615
3	0.0337637	0.794929
4	0.0337637	0.741229
5	0.0337637	0.699576
6	0.0337637	0.665544
1	1	1
2	0.75673	0.870615
3	0.75673	0.794929
4	0.75673	0.741229
5	0.75673	0.699576
6	0.75673	0.665544
1	1	1
2	0.939572	0.870615
3	0.918704	0.794929
4	0.880626	0.741229
5	0.863466	0.699576
6	0.7651	0.665544
1	1	1
2	0.523756	0.870615
3	0.523756	0.794929
4	0.523756	0.741229
5	0.507696	0.699576
6	0.503449	0.665544
1	1	1
2	1	0.870615
3	0.990977	0.794929
4	0.880693	0.741229
5	0.860937	0.699576
6	0.860937	0.665544
1	1	1
2	1	0.870615
3	1	0.794929
4	1	0.741229
5	1	0.699576
6	1	0.665544
1	1	1
2	1	0.870615
3	1	0.794929
4	0.834932	0.741229
5	0.655912	0.699576
6	0.576992	0.665544
1	1	1
2	0.811843	0.870615
3	0.706042	0.794929
4	0.706042	0.741229
5	0.706042	0.699576
1	1	1
2	1	0.870615
3	1	0.794929
4	1	0.741229
5	0.97099	0.699576
1	1	1
2	0.906462	0.870615
3	0.651356	0.794929
4	0.473001	0.741229
5	0.301453	0.699576
1	1	1
2	0.865712	0.870615
3	0.792793	0.794929
4	0.539916	0.741229
5	0	0.699576
1	1	1
2	1	0.870615
3	1	0.794929
4	1	0.741229
5	1	0.699576
1	1	1
2	0.969274	0.870615
3	0.924391	0.794929
4	0.877771	0.741229
5	0.844032	0.699576
1	1	1
2	0.833342	0.870615
3	0.833342	0.794929
4	0.807699	0.741229
5	0.758654	0.699576
1	1	1
2	1	0.870615
3	1	0.794929
4	1	0.741229
5	1	0.699576
1	1	1
2	0.860297	0.870615
3	0.855865	0.794929
4	0.776241	0.741229
5	0.697291	0.699576
1	1	1
2	1	0.870615
3	1	0.794929
4	1	0.741229
5	1	0.699576
1	1	1
2	0.69371	0.870615
3	0.69371	0.794929
4	0.69371	0.741229
5	0.69371	0.699576
1	1	1
2	0.944886	0.870615
3	0.60693	0.794929
4	0.491819	0.741229
5	0.459765	0.699576
1	1	1
2	1	0.870615
3	1	0.794929
4	1	0.741229
5	1	0.699576
1	1	1
2	0.934268	0.870615
3	0.934268	0.794929
4	0.934268	0.741229
1	1	1
2	0.917534	0.870615
3	0.792296	0.794929
4	0.774535	0.741229
1	1	1
2	0.458349	0.870615
3	0.228308	0.794929
4	0.105371	0.741229
1	1	1
2	0.807306	0.870615
3	0.00435727	0.794929
4	0	0.741229
1	1	1
2	0.952112	0.870615
3	0.909502	0.794929
4	0.909502	0.741229
1	1	1
2	0.787761	0.870615
3	0.771328	0.794929
4	0.69046	0.741229
1	1	1
2	0.885607	0.870615
3	0.885607	0.794929
4	0.885607	0.741229
1	1	1
2	0.975164	0.870615
3	0.958041	0.794929
4	0.923048	0.741229
1	1	1
2	0.922362	0.870615
3	0.823461	0.794929
4	0.745957	0.741229
1	1	1
2	1	0.870615
3	1	0.794929
4	1	0.741229
1	1	1
2	0.832984	0.870615
3	0.781702	0.794929
4	0.74527	0.741229
1	1	1
2	1	0.870615
3	1	0.794929
4	0.988401	0.741229
1	1	1
2	1	0.870615
3	1	0.794929
1	1	1
2	0.860479	0.870615
3	0.860479	0.794929
1	1	1
2	0.985675	0.870615
3	0.943957	0.794929
1	1	1
2	0.721097	0.870615
3	0	0.794929
1	1	1
2	0.910131	0.870615
3	0.642983	0.794929
1	1	1
2	0.848745	0.870615
3	0.841053	0.794929
1	1	1
2	0.880777	0.870615
3	0.814293	0.794929
1	1	1
2	0.9871	0.870615
3	0.9871	0.794929
1	1	1
2	0.855717	0.870615
3	0.789958	0.794929
1	1	1
2	0.947614	0.870615
3	0.947614	0.794929
1	1	1
2	0.996334	0.870615
3	0.985546	0.794929
1	1	1
2	0.87818	0.870615
3	0.87818	0.794929
1	1	1
2	0.874754	0.870615
1	1	1
2	1	0.870615
1	1	1
2	0	0.870615
1	1	1
2	1	0.870615
1	1	1
2	0.970272	0.870615
1	1	1
2	0.417056	0.870615
1	1	1
2	0.733162	0.870615
1	1	1
2	0.67077	0.870615
1	1	1
2	0.933331	0.870615
1	1	1
2	0.908814	0.870615
1	1	1
2	0.996394	0.870615
1	1	1
2	1	0.870615
1	1	1
2	0.992588	0.870615
1	1	1
2	1	0.870615

## Sheet: NAYS2D_Bar
		RMS Err	R
		0.027462	0.847674
		m	R^2
		-0.0845284	0.718551
Stage (Normalized)	Preservation %	Fit
1	1	1
2	0.993916	0.941409
3	0.969431	0.907136
4	0.944575	0.882819
5	0.938442	0.863957
6	0.917318	0.848545
7	0.871821	0.835515
8	0.788229	0.824228
9	0.713047	0.814272
10	0.690223	0.805366
11	0.690223	0.79731
12	0.690223	0.789955
13	0.690223	0.783189
1	1	1
2	1	0.941409
3	0.996404	0.907136
4	0.945498	0.882819
5	0.926541	0.863957
6	0.926541	0.848545
1	1	1
2	0.983301	0.941409
3	0.972306	0.907136
4	0.966459	0.882819
5	0.937667	0.863957

## Sheet: NAYS2D_MB
		RMS Err	R
		0.0764163	0.897338
		m	R^2
		-0.171497	0.805215
Stage (Normalized)	Preservation %	Fit
1	1	1
2	0.963536	0.881128
3	0.886794	0.811592
4	0.791159	0.762255
5	0.733931	0.723987
6	0.71433	0.692719
7	0.694762	0.666283
8	0.694762	0.643383
9	0.66979	0.623183
10	0.651135	0.605114
11	0.574763	0.588769
12	0.511691	0.573847
13	0.511691	0.56012
14	0.511691	0.547411
15	0.511691	0.535579
16	0.511691	0.52451
1	1	1
2	0.931406	0.881128
3	0.724096	0.811592
4	0.610476	0.762255
5	0.569486	0.723987
6	0.549742	0.692719
7	0.546592	0.666283
8	0.528898	0.643383
9	0.504945	0.623183
10	0.457657	0.605114
11	0.421655	0.588769
12	0.421655	0.573847
13	0.421655	0.56012
14	0.421655	0.547411
15	0.421655	0.535579
1	1	1
2	0.794632	0.881128
3	0.677559	0.811592
4	0.649859	0.762255
5	0.636346	0.723987
6	0.633463	0.692719
7	0.619892	0.666283
8	0.594386	0.643383
9	0.544913	0.623183
10	0.501203	0.605114
11	0.491151	0.588769
12	0.491151	0.573847
13	0.491151	0.56012
14	0.491151	0.547411
1	1	1
2	0.726336	0.881128
3	0.698049	0.811592
4	0.684122	0.762255
5	0.67686	0.723987
6	0.660295	0.692719
7	0.630743	0.666283
8	0.584342	0.643383
9	0.538666	0.623183
10	0.526239	0.605114
11	0.526239	0.588769
12	0.526239	0.573847
13	0.526239	0.56012
1	1	1
2	0.912324	0.881128
3	0.883512	0.811592
4	0.867074	0.762255
5	0.825926	0.723987
6	0.774453	0.692719
7	0.724079	0.666283
8	0.67964	0.643383
9	0.662386	0.623183
10	0.656591	0.605114
11	0.647449	0.588769
12	0.60661	0.573847
1	1	1
2	0.955094	0.881128
3	0.935183	0.811592
4	0.900791	0.762255
5	0.861414	0.723987
6	0.821653	0.692719
7	0.772353	0.666283
8	0.72964	0.643383
9	0.720576	0.623183
10	0.708695	0.605114
11	0.669969	0.588769
1	1	1
2	0.964499	0.881128
3	0.925766	0.811592
4	0.879412	0.762255
5	0.835936	0.723987
6	0.793074	0.692719
7	0.74307	0.666283
8	0.727993	0.643383
9	0.710073	0.623183
10	0.670797	0.605114
1	1	1
2	0.954267	0.881128
3	0.888412	0.811592
4	0.843976	0.762255
5	0.793566	0.723987
6	0.737082	0.692719
7	0.705505	0.666283
8	0.688545	0.643383
9	0.654847	0.623183
1	1	1
2	0.926278	0.881128
3	0.881147	0.811592
4	0.813327	0.762255
5	0.7572	0.723987
6	0.720327	0.692719
7	0.703565	0.666283
8	0.671994	0.643383
1	1	1
2	0.934572	0.881128
3	0.859999	0.811592
4	0.802793	0.762255
5	0.767689	0.723987
6	0.74433	0.692719
7	0.712801	0.666283
1	1	1
2	0.90596	0.881128
3	0.84791	0.811592
4	0.802759	0.762255
5	0.776884	0.723987
6	0.744193	0.692719
1	1	1
2	0.930653	0.881128
3	0.875844	0.811592
4	0.841021	0.762255
5	0.798228	0.723987
1	1	1
2	0.927431	0.881128
3	0.873958	0.811592
4	0.829193	0.762255
1	1	1
2	0.938153	0.881128
3	0.890587	0.811592
1	1	1
2	0.945785	0.881128
1	1	1

## Sheet: Helena_AP
		RMS Err	R
		0.337844	0.54974
		m	R^2
		-0.33144	0.302214
Stage (Normalized)	Preservation %	Fit
1	1	1
2	0.919129	0.770263
3	0.865298	0.635876
4	0.78643	0.540527
5	0.78643	0.466568
6	0.78643	0.40614
7	0.729343	0.355048
8	0.411268	0.31079
9	0.411268	0.271752
10	0.411268	0.236832
11	0.411268	0.205242
12	0.411268	0.176403
13	0.411268	0.149874
14	0.411268	0.125312
15	0.411268	0.102445
16	0.411268	0.0810539
1	1	1
2	1	0.770263
3	1	0.635876
4	1	0.540527
5	1	0.466568
6	1	0.40614
7	1	0.355048
8	1	0.31079
9	1	0.271752
10	1	0.236832
11	1	0.205242
12	1	0.176403
13	1	0.149874
14	1	0.125312
15	1	0.102445
1	1	1
2	0.372975	0.770263
3	0.131635	0.635876
4	0.131635	0.540527
5	0.131635	0.466568
6	0.131635	0.40614
7	0.131635	0.355048
8	0.131635	0.31079
9	0.131635	0.271752
10	0.131635	0.236832
11	0.131635	0.205242
12	0.131635	0.176403
13	0.131635	0.149874
14	0.131635	0.125312
15	0.131635	0.102445
16	0.131635	0.0810539
1	1	1
2	1	0.770263
3	1	0.635876
4	1	0.540527
5	1	0.466568
6	1	0.40614
7	1	0.355048
8	1	0.31079
9	1	0.271752
10	1	0.236832
11	1	0.205242
12	1	0.176403
13	1	0.149874
14	1	0.125312
15	1	0.102445
1	1	1
2	1	0.770263
3	0.149828	0.635876
4	0	0.540527
5	0	0.466568
6	0	0.40614
7	0	0.355048
8	0	0.31079
9	0	0.271752
10	0	0.236832
11	0	0.205242
12	0	0.176403
13	0	0.149874
14	0	0.125312
15	0	0.102445
16	0	0.0810539
1	1	1
2	0.376195	0.770263
3	0.1797	0.635876
4	0.17954	0.540527
5	0.129168	0.466568
6	0.129168	0.40614
7	0.0959965	0.355048
8	0.0959965	0.31079
9	0.0959965	0.271752
10	0.0959965	0.236832
11	0.0959965	0.205242
12	0.0959965	0.176403
13	0.0959965	0.149874
14	0.0959965	0.125312
15	0.0959965	0.102445
1	1	1
2	0.477371	0.770263
3	0.429713	0.635876
4	0	0.540527
5	0	0.466568
6	0	0.40614
7	0	0.355048
8	0	0.31079
9	0	0.271752
10	0	0.236832
11	0	0.205242
12	0	0.176403
13	0	0.149874
14	0	0.125312
1	1	1
2	1	0.770263
3	0.0877362	0.635876
4	0.00203437	0.540527
5	0.00203437	0.466568
6	0.00203437	0.40614
7	0.00203437	0.355048
8	0.00203437	0.31079
9	0.00203437	0.271752
10	0.00203437	0.236832
11	0.00203437	0.205242
12	0.00203437	0.176403
13	0.00203437	0.149874
1	1	1
2	0.176279	0.770263
3	0	0.635876
4	0	0.540527
5	0	0.466568
6	0	0.40614
7	0	0.355048
8	0	0.31079
9	0	0.271752
10	0	0.236832
11	0	0.205242
12	0	0.176403
1	1	1
2	0.532145	0.770263
3	0.233024	0.635876
4	0	0.540527
5	0	0.466568
6	0	0.40614
7	0	0.355048
8	0	0.31079
9	0	0.271752
10	0	0.236832
11	0	0.205242
12	0	0.176403
13	0	0.149874
14	0	0.125312
1	1	1
2	1	0.770263
3	1	0.635876
4	0.952268	0.540527
5	0.916817	0.466568
6	0.672039	0.40614
7	0.672039	0.355048
8	0.672039	0.31079
9	0.304254	0.271752
10	0.304254	0.236832
11	0.304254	0.205242
12	0.304254	0.176403
13	0.304254	0.149874
1	1	1
2	0.250941	0.770263
3	0.205771	0.635876
4	0.205771	0.540527
5	0.0562465	0.466568
6	0	0.40614
7	0	0.355048
8	0	0.31079
9	0	0.271752
10	0	0.236832
11	0	0.205242
12	0	0.176403
13	0	0.149874
14	0	0.125312
1	1	1
2	1	0.770263
3	1	0.635876
4	0.33048	0.540527
5	0	0.466568
6	0	0.40614
7	0	0.355048
8	0	0.31079
9	0	0.271752
10	0	0.236832
11	0	0.205242
12	0	0.176403
13	0	0.149874
1	1	1
2	0.522557	0.770263
3	0.0892377	0.635876
4	0	0.540527
5	0	0.466568
6	0	0.40614
7	0	0.355048
8	0	0.31079
9	0	0.271752
10	0	0.236832
11	0	0.205242
12	0	0.176403
1	1	1
2	1	0.770263
3	0.276016	0.635876
4	0.276016	0.540527
5	0.276016	0.466568
6	0.276016	0.40614
7	0.262408	0.355048
8	0.262408	0.31079
9	0.262408	0.271752
10	0.262408	0.236832
11	0.262408	0.205242
1	1	1
2	0.270636	0.770263
3	0.270636	0.635876
4	0.270636	0.540527
5	0.270636	0.466568
6	0.23684	0.40614
7	0.23684	0.355048
8	0.23684	0.31079
9	0.23684	0.271752
10	0.23684	0.236832
1	1	1
2	1	0.770263
3	1	0.635876
4	1	0.540527
5	1	0.466568
6	0.997194	0.40614
7	0.997194	0.355048
8	0.997194	0.31079
9	0.997194	0.271752
1	1	1
2	0.893159	0.770263
3	0.630919	0.635876
4	0.0179688	0.540527
5	0	0.466568
6	0	0.40614
7	0	0.355048
8	0	0.31079
9	0	0.271752
10	0	0.236832
11	0	0.205242
12	0	0.176403
13	0	0.149874
1	1	1
2	0.853824	0.770263
3	0.497418	0.635876
4	0.290994	0.540527
5	0.247278	0.466568
6	0.198703	0.40614
7	0.0226122	0.355048
8	0.0226122	0.31079
9	0.0135876	0.271752
10	0.0135876	0.236832
11	0.0135876	0.205242
12	0.0135876	0.176403
1	1	1
2	0.841934	0.770263
3	0.841934	0.635876
4	0.378408	0.540527
5	0.17298	0.466568
6	0.0796965	0.40614
7	0.0796965	0.355048
8	0.0796965	0.31079
9	0.0796965	0.271752
10	0.0796965	0.236832
11	0.0184882	0.205242
1	1	1
2	0.701081	0.770263
3	0.168435	0.635876
4	0.148352	0.540527
5	0.148352	0.466568
6	0.148352	0.40614
7	0.148352	0.355048
8	0.148352	0.31079
9	0.148352	0.271752
10	0.148352	0.236832
1	1	1
2	0.44601	0.770263
3	0.414023	0.635876
4	0.13039	0.540527
5	0.13039	0.466568
6	0.13039	0.40614
1	1	1
2	1	0.770263
3	1	0.635876
4	1	0.540527
5	1	0.466568
6	1	0.40614
7	1	0.355048
8	1	0.31079
1	1	1
2	0.813784	0.770263
3	0.780262	0.635876
4	0.780262	0.540527
5	0.780262	0.466568
6	0.780262	0.40614
7	0.780262	0.355048
8	0.780262	0.31079
9	0.780262	0.271752
10	0.780262	0.236832
11	0.652431	0.205242
12	0.652431	0.176403
13	0.652431	0.149874
1	1	1
2	0.95588	0.770263
3	0.95588	0.635876
4	0.95588	0.540527
5	0.95588	0.466568
6	0.95588	0.40614
7	0.95588	0.355048
8	0.95588	0.31079
9	0.95588	0.271752
10	0.95588	0.236832
11	0.95588	0.205242
12	0.95588	0.176403
1	1	1
2	0.866995	0.770263
3	0.742823	0.635876
4	0.543266	0.540527
5	0.53995	0.466568
6	0.53995	0.40614
7	0.53995	0.355048
8	0.53995	0.31079
9	0.53995	0.271752
10	0.53995	0.236832
11	0.53995	0.205242
1	1	1
2	0.590689	0.770263
3	0.515892	0.635876
4	0.38927	0.540527
5	0.38927	0.466568
6	0.38927	0.40614
7	0.339037	0.355048
8	0.339037	0.31079
9	0.339037	0.271752
10	0.339037	0.236832
1	1	1
2	0.926836	0.770263
3	0.926836	0.635876
4	0.926836	0.540527
5	0.926836	0.466568
6	0.926836	0.40614
7	0.926836	0.355048
8	0.926836	0.31079
9	0.926836	0.271752
1	1	1
2	0.758088	0.770263
3	0.758088	0.635876
4	0.758088	0.540527
5	0.758088	0.466568
6	0.758088	0.40614
7	0.68361	0.355048
8	0.556422	0.31079
9	0.346874	0.271752
10	0.206498	0.236832
1	1	1
2	1	0.770263
3	1	0.635876
4	1	0.540527
5	1	0.466568
6	1	0.40614
7	1	0.355048
8	1	0.31079
9	1	0.271752
10	0.951176	0.236832
1	1	1
2	0.948972	0.770263
3	0.924545	0.635876
4	0.702775	0.540527
5	0.574543	0.466568
6	0.417832	0.40614
7	0.301869	0.355048
8	0.301869	0.31079
9	0.230752	0.271752
10	0.105743	0.236832
1	1	1
2	0.977014	0.770263
3	0.79124	0.635876
4	0.435503	0.540527
5	0.288823	0.466568
6	0.183719	0.40614
7	0.183719	0.355048
8	0.0571804	0.31079
9	0.0571804	0.271752
1	1	1
2	0.79163	0.770263
3	0.547781	0.635876
4	0.2201	0.540527
5	0.2201	0.466568
6	0.2201	0.40614
7	0.2201	0.355048
8	0.167579	0.31079
9	0.151821	0.271752
1	1	1
2	0.776717	0.770263
3	0.179505	0.635876
4	0.179505	0.540527
5	0.0883541	0.466568
6	0.0883541	0.40614
7	0.0883541	0.355048
8	0	0.31079
1	1	1
2	0	0.770263
3	0	0.635876
4	0	0.540527
5	0	0.466568
6	0	0.40614
7	0	0.355048
1	1	1
2	0.823935	0.770263
3	0.810422	0.635876
4	0.810422	0.540527
5	0.575123	0.466568
6	0.165292	0.40614
7	0	0.355048
8	0	0.31079
1	1	1
2	0.758237	0.770263
3	0.758237	0.635876
4	0.739199	0.540527
5	0.267835	0.466568
6	0	0.40614
7	0	0.355048
1	1	1
2	0.850834	0.770263
3	0.259123	0.635876
4	0.122415	0.540527
5	0.0954282	0.466568
6	0.0954282	0.40614
1	1	1
2	0.607668	0.770263
3	0.607668	0.635876
4	0.607668	0.540527
5	0.607668	0.466568
1	1	1
2	0.903368	0.770263
3	0.860514	0.635876
4	0.851394	0.540527
5	0.756637	0.466568
6	0.441667	0.40614
7	0.185112	0.355048
8	0.1842	0.31079
1	1	1
2	1	0.770263
3	1	0.635876
4	0.934782	0.540527
5	0.328746	0.466568
6	0.198882	0.40614
7	0.198882	0.355048
1	1	1
2	0.614169	0.770263
3	0.509568	0.635876
4	0.118773	0.540527
5	0.0297844	0.466568
6	0	0.40614
1	1	1
2	0.528574	0.770263
3	0.173474	0.635876
4	0	0.540527
5	0	0.466568
6	0	0.40614
7	0	0.355048
8	0	0.31079
1	1	1
2	0.713146	0.770263
3	0.537155	0.635876
4	0.501433	0.540527
5	0.501433	0.466568
6	0.501433	0.40614
7	0.320955	0.355048
1	1	1
2	0.649303	0.770263
3	0.527498	0.635876
4	0.527498	0.540527
5	0.527498	0.466568
6	0.353064	0.40614
7	0.0903531	0.355048
1	1	1
2	0.843425	0.770263
3	0.806361	0.635876
4	0.806361	0.540527
5	0.380995	0.466568
6	0	0.40614
1	1	1
2	0.991906	0.770263
3	0.991906	0.635876
4	0.374775	0.540527
5	0.292003	0.466568
1	1	1
2	0.990959	0.770263
3	0.901937	0.635876
4	0.784961	0.540527
1	1	1
2	0.568463	0.770263
3	0	0.635876
4	0	0.540527
5	0	0.466568
6	0	0.40614
1	1	1
2	0.621271	0.770263
3	0.557552	0.635876
4	0.237563	0.540527
5	0.177732	0.466568
1	1	1
2	0.930991	0.770263
3	0.930991	0.635876
4	0.76965	0.540527
5	0.761817	0.466568
1	1	1
2	0.978794	0.770263
3	0.511725	0.635876
4	0.511725	0.540527
1	1	1
2	1	0.770263
3	0.613958	0.635876
4	0.454701	0.540527
5	0.098928	0.466568
1	1	1
2	0	0.770263
3	0	0.635876

## Sheet: Helena_Bar
		RMS Err	R
		0.292907	0.500253
		m	R^2
		-0.290809	0.250253
Stage (Normalized)	Preservation %	Fit
1	1	1
2	0.944219	0.798427
3	0.862493	0.680514
4	0.862493	0.596854
5	0.862493	0.531961
6	0.803338	0.478941
7	0.473739	0.434112
8	0.473739	0.39528
9	0.473739	0.361028
10	0.473739	0.330388
11	0.473739	0.302671
12	0.473739	0.277367
13	0.473739	0.25409
14	0.473739	0.232539
15	0.473739	0.212475
1	1	1
2	0.40096	0.798427
3	0.40096	0.680514
4	0.40096	0.596854
5	0.40096	0.531961
6	0.40096	0.478941
7	0.40096	0.434112
8	0.40096	0.39528
9	0.40096	0.361028
10	0.40096	0.330388
11	0.40096	0.302671
12	0.40096	0.277367
13	0.40096	0.25409
14	0.40096	0.232539
15	0.40096	0.212475
1	1	1
2	0.314067	0.798427
3	0.232449	0.680514
4	0.172904	0.596854
5	0.172904	0.531961
6	0.172904	0.478941
7	0.172904	0.434112
8	0.172904	0.39528
9	0.172904	0.361028
10	0.172904	0.330388
11	0.172904	0.302671
12	0.172904	0.277367
1	1	1
2	0.558591	0.798427
3	0.21472	0.680514
4	0.204471	0.596854
5	0.196859	0.531961
6	0.1443	0.478941
7	0.1443	0.434112
8	0.1443	0.39528
9	0.0653295	0.361028
10	0.0653295	0.330388
11	0.0653295	0.302671
12	0.0653295	0.277367
13	0.0653295	0.25409
1	1	1
2	1	0.798427
3	1	0.680514
4	1	0.596854
5	0.952226	0.531961
6	0.950624	0.478941
7	0.950624	0.434112
8	0.950624	0.39528
9	0.950624	0.361028
1	1	1
2	0.842383	0.798427
3	0.489584	0.680514
4	0.489584	0.596854
5	0.485152	0.531961
6	0.485152	0.478941
7	0.485152	0.434112
8	0.455722	0.39528
1	1	1
2	0.957055	0.798427
3	0.957055	0.680514
4	0.957055	0.596854
5	0.957055	0.531961
6	0.957055	0.478941
7	0.957055	0.434112
8	0.957055	0.39528
9	0.957055	0.361028
10	0.893964	0.330388
11	0.893964	0.302671
12	0.893964	0.277367
1	1	1
2	0.845746	0.798427
3	0.764537	0.680514
4	0.764537	0.596854
5	0.764537	0.531961
6	0.732875	0.478941
7	0.732875	0.434112
8	0.732875	0.39528
9	0.732875	0.361028
1	1	1
2	0.820348	0.798427
3	0.820348	0.680514
4	0.820348	0.596854
5	0.820348	0.531961
6	0.820348	0.478941
7	0.765038	0.434112
8	0.670584	0.39528
9	0.514967	0.361028
1	1	1
2	0.974492	0.798427
3	0.744846	0.680514
4	0.59108	0.596854
5	0.427502	0.531961
6	0.306747	0.478941
7	0.306747	0.434112
8	0.227447	0.39528
9	0.106845	0.361028
1	1	1
2	0.79163	0.798427
3	0.547781	0.680514
4	0.2201	0.596854
5	0.2201	0.531961
6	0.2201	0.478941
7	0.2201	0.434112
8	0.167579	0.39528
9	0.151821	0.361028
1	1	1
2	0.124623	0.798427
3	0.124623	0.680514
4	0.0613403	0.596854
5	0.0613403	0.531961
6	0.0613403	0.478941
7	0	0.434112
1	1	1
2	0.446306	0.798427
3	0.224712	0.680514
4	0.148801	0.596854
5	0.148801	0.531961
1	1	1
2	0.818148	0.798427
3	0.713437	0.680514
4	0.320677	0.596854
5	0.129157	0.531961
6	0.115004	0.478941
1	1	1
2	0.569775	0.798427
3	0.337099	0.680514
4	0.314681	0.596854
5	0.314681	0.531961
6	0.314681	0.478941
7	0.201419	0.434112
1	1	1
2	0.996668	0.798427
3	0.636318	0.680514
4	0.402744	0.596854
1	1	1
2	0.573283	0.798427
3	0.514486	0.680514
4	0.219213	0.596854
5	0.164004	0.531961
1	1	1
2	0.991252	0.798427
3	0.696772	0.680514
4	0.69183	0.596854
1	1	1
2	0.0842069	0.798427
3	0.0623642	0.680514
4	0.0135684	0.596854

## Sheet: Helena_MB
		RMS Err	R
		0.109407	0.906719
		m	R^2
		-0.326505	0.822139
Stage (Normalized)	Preservation %	Fit
1	1	1
2	0.643852	0.773684
3	0.405252	0.641298
4	0.359643	0.547368
5	0.359643	0.474511
6	0.359643	0.414982
7	0.338508	0.364651
8	0.220747	0.321052
9	0.220747	0.282596
10	0.220747	0.248195
11	0.220747	0.217076
12	0.220747	0.188666
13	0.220747	0.162532
14	0.220747	0.138335
15	0.220747	0.115809
16	0.220747	0.0947365
1	1	1
2	0.495966	0.773684
3	0.3565	0.641298
4	0.356411	0.547368
5	0.328296	0.474511
6	0.31449	0.414982
7	0.219048	0.364651
8	0.219048	0.321052
9	0.219048	0.282596
10	0.219048	0.248195
11	0.219048	0.217076
12	0.219048	0.188666
13	0.219048	0.162532
14	0.219048	0.138335
15	0.219048	0.115809
1	1	1
2	0.577312	0.773684
3	0.4378	0.641298
4	0.293807	0.547368
5	0.266714	0.474511
6	0.181673	0.414982
7	0.181673	0.364651
8	0.181673	0.321052
9	0.181673	0.282596
10	0.181673	0.248195
11	0.181673	0.217076
12	0.181673	0.188666
13	0.181673	0.162532
14	0.181673	0.138335
1	1	1
2	0.825809	0.773684
3	0.563843	0.641298
4	0.417035	0.547368
5	0.305335	0.474511
6	0.288343	0.414982
7	0.288343	0.364651
8	0.288343	0.321052
9	0.262812	0.282596
10	0.262812	0.248195
11	0.255225	0.217076
12	0.255225	0.188666
13	0.255225	0.162532
1	1	1
2	0.654707	0.773684
3	0.423325	0.641298
4	0.304338	0.547368
5	0.287259	0.474511
6	0.282072	0.414982
7	0.263271	0.364651
8	0.244622	0.321052
9	0.243659	0.282596
10	0.238117	0.248195
11	0.238117	0.217076
12	0.238117	0.188666
1	1	1
2	0.702945	0.773684
3	0.531352	0.641298
4	0.436637	0.547368
5	0.405773	0.474511
6	0.373067	0.414982
7	0.351273	0.364651
8	0.35017	0.321052
9	0.343822	0.282596
10	0.343822	0.248195
11	0.336493	0.217076
1	1	1
2	0.712516	0.773684
3	0.587606	0.641298
4	0.517068	0.547368
5	0.474426	0.474511
6	0.431574	0.414982
7	0.403767	0.364651
8	0.392285	0.321052
9	0.369882	0.282596
10	0.337893	0.248195
1	1	1
2	0.790974	0.773684
3	0.688507	0.641298
4	0.566327	0.547368
5	0.527116	0.474511
6	0.501443	0.414982
7	0.475754	0.364651
8	0.48781	0.321052
9	0.457575	0.282596
1	1	1
2	0.862729	0.773684
3	0.707739	0.641298
4	0.662381	0.547368
5	0.619934	0.474511
6	0.554073	0.414982
7	0.536034	0.364651
8	0.503765	0.321052
1	1	1
2	0.79264	0.773684
3	0.735337	0.641298
4	0.690288	0.547368
5	0.608701	0.474511
6	0.576032	0.414982
7	0.524981	0.364651
1	1	1
2	0.886255	0.773684
3	0.759856	0.641298
4	0.63407	0.547368
5	0.578761	0.474511
6	0.515094	0.414982
1	1	1
2	0.844063	0.773684
3	0.720238	0.641298
4	0.612611	0.547368
5	0.543393	0.474511
1	1	1
2	0.834583	0.773684
3	0.704482	0.641298
4	0.625622	0.547368

## Sheet: McM_AP
		RMS Err	R
		0.288212	0.557629
		m	R^2
		-0.278403	0.31095
Stage (Normalized)	Preservation %	Fit
1	1	1
2	0.738678	0.807026
3	0.305954	0.694143
4	0.0565844	0.614052
5	0	0.551928
6	0	0.501169
7	0	0.458254
8	0	0.421078
9	0	0.388287
10	0	0.358954
11	0	0.33242
12	0	0.308196
1	1	1
2	0.808609	0.807026
3	0.599618	0.694143
4	0.599618	0.614052
5	0.556249	0.551928
6	0.556249	0.501169
7	0.241015	0.458254
8	0.241015	0.421078
9	0.241015	0.388287
10	0.241015	0.358954
11	0.241015	0.33242
12	0.241015	0.308196
1	1	1
2	0.730105	0.807026
3	0.268857	0.694143
4	0.0364726	0.614052
5	0.0364726	0.551928
6	0.0364726	0.501169
7	0.0364726	0.458254
8	0.0364726	0.421078
9	0.0364726	0.388287
10	0.0364726	0.358954
11	0.0364726	0.33242
12	0.0364726	0.308196
1	1	1
2	0.663371	0.807026
3	0.663371	0.694143
4	0.510182	0.614052
5	0.510182	0.551928
6	0.510182	0.501169
7	0.510182	0.458254
8	0.510182	0.421078
9	0.510182	0.388287
10	0.510182	0.358954
11	0.510182	0.33242
12	0.510182	0.308196
1	1	1
2	0.898041	0.807026
3	0.823931	0.694143
4	0.0452271	0.614052
5	0.0452271	0.551928
6	0.0452271	0.501169
7	0.0452271	0.458254
8	0.0452271	0.421078
9	0.0452271	0.388287
10	0.0452271	0.358954
11	0.0452271	0.33242
1	1	1
2	0.941867	0.807026
3	0.941867	0.694143
4	0.376926	0.614052
5	0.376926	0.551928
6	0.376926	0.501169
7	0.376926	0.458254
8	0.376926	0.421078
9	0.376926	0.388287
10	0.376926	0.358954
11	0.376926	0.33242
1	1	1
2	0.735777	0.807026
3	0.37427	0.694143
4	0.325407	0.614052
5	0.325407	0.551928
6	0.325407	0.501169
7	0.325407	0.458254
8	0.325407	0.421078
9	0.325407	0.388287
10	0.325407	0.358954
11	0.325407	0.33242
1	1	1
2	0.977782	0.807026
3	0.977782	0.694143
4	0.977782	0.614052
5	0.977782	0.551928
6	0.977782	0.501169
7	0.839766	0.458254
8	0.531499	0.421078
9	0.531499	0.388287
10	0.531499	0.358954
11	0.531499	0.33242
1	1	1
2	1	0.807026
3	0.911859	0.694143
4	0.911859	0.614052
5	0.911859	0.551928
6	0.911859	0.501169
7	0.911859	0.458254
8	0.911859	0.421078
9	0.911859	0.388287
10	0.911859	0.358954
1	1	1
2	1	0.807026
3	0.817298	0.694143
4	0.817298	0.614052
5	0.817298	0.551928
6	0.817298	0.501169
7	0.817298	0.458254
8	0.817298	0.421078
9	0.817298	0.388287
10	0.817298	0.358954
1	1	1
2	0.649757	0.807026
3	0.306032	0.694143
4	0.306032	0.614052
5	0.306032	0.551928
6	0.306032	0.501169
7	0.306032	0.458254
8	0.306032	0.421078
9	0.306032	0.388287
10	0.306032	0.358954
1	1	1
2	0.918876	0.807026
3	0.918876	0.694143
4	0.918876	0.614052
5	0.852995	0.551928
6	0.453299	0.501169
7	0.236133	0.458254
8	0.225378	0.421078
9	0.225378	0.388287
10	0.225378	0.358954
1	1	1
2	0.597214	0.807026
3	0.569413	0.694143
4	0.437624	0.614052
5	0.437624	0.551928
6	0.437624	0.501169
7	0.437624	0.458254
8	0.437624	0.421078
9	0.437624	0.388287
1	1	1
2	0.720412	0.807026
3	0.65442	0.694143
4	0.65442	0.614052
5	0.65442	0.551928
6	0.65442	0.501169
7	0.65442	0.458254
8	0.65442	0.421078
9	0.65442	0.388287
1	1	1
2	0.426966	0.807026
3	0.426966	0.694143
4	0.426966	0.614052
5	0.426966	0.551928
6	0.426966	0.501169
7	0.426966	0.458254
8	0.426966	0.421078
9	0.426966	0.388287
1	1	1
2	1	0.807026
3	0.993594	0.694143
4	0.717899	0.614052
5	0.540464	0.551928
6	0.351948	0.501169
7	0.304792	0.458254
8	0.304792	0.421078
9	0.304792	0.388287
1	1	1
2	1	0.807026
3	1	0.694143
4	1	0.614052
5	1	0.551928
6	1	0.501169
7	1	0.458254
8	1	0.421078
9	1	0.388287
10	1	0.358954
1	1	1
2	1	0.807026
3	1	0.694143
4	1	0.614052
5	1	0.551928
6	1	0.501169
7	1	0.458254
8	1	0.421078
9	1	0.388287
1	1	1
2	0.857991	0.807026
3	0.857991	0.694143
4	0.857991	0.614052
5	0.857991	0.551928
6	0.857991	0.501169
7	0.767816	0.458254
8	0.767816	0.421078
1	1	1
2	1	0.807026
3	1	0.694143
4	1	0.614052
5	1	0.551928
6	1	0.501169
7	1	0.458254
8	1	0.421078
1	1	1
2	1	0.807026
3	1	0.694143
4	1	0.614052
5	1	0.551928
6	1	0.501169
7	1	0.458254
8	1	0.421078
1	1	1
2	0.994849	0.807026
3	0.895444	0.694143
4	0.895444	0.614052
5	0.895444	0.551928
6	0.895444	0.501169
7	0.895444	0.458254
8	0.895444	0.421078
1	1	1
2	0.984471	0.807026
3	0.479843	0.694143
4	0.479843	0.614052
5	0.479843	0.551928
6	0.479843	0.501169
7	0.479843	0.458254
8	0.479843	0.421078
1	1	1
2	0.61285	0.807026
3	0	0.694143
4	0	0.614052
5	0	0.551928
6	0	0.501169
7	0	0.458254
8	0	0.421078
1	1	1
2	0.660422	0.807026
3	0.0930589	0.694143
4	0.0930589	0.614052
5	0.0930589	0.551928
6	0	0.501169
7	0	0.458254
8	0	0.421078
1	1	1
2	0.828177	0.807026
3	0.828177	0.694143
4	0.828177	0.614052
5	0.828177	0.551928
6	0.828177	0.501169
7	0.828177	0.458254
1	1	1
2	0.60224	0.807026
3	0.247642	0.694143
4	0.247642	0.614052
5	0.247642	0.551928
6	0.247642	0.501169
7	0.247642	0.458254
1	1	1
2	0.887668	0.807026
3	0.887668	0.694143
4	0.887668	0.614052
5	0.881034	0.551928
6	0.817472	0.501169
7	0.817472	0.458254
1	1	1
2	0.72206	0.807026
3	0.72206	0.694143
4	0.698879	0.614052
5	0.343816	0.551928
6	0.343816	0.501169
7	0.343816	0.458254
1	1	1
2	1	0.807026
3	1	0.694143
4	0.956709	0.614052
5	0.510399	0.551928
6	0.510399	0.501169
1	1	1
2	0.920524	0.807026
3	0.82349	0.694143
4	0.82349	0.614052
5	0.82349	0.551928
6	0.82349	0.501169
1	1	1
2	1	0.807026
3	1	0.694143
4	1	0.614052
5	0.997045	0.551928
6	0.997045	0.501169
1	1	1
2	1	0.807026
3	1	0.694143
4	0.971083	0.614052
5	0.971083	0.551928
6	0.971083	0.501169
1	1	1
2	0.22681	0.807026
3	0.22681	0.694143
4	0.22681	0.614052
5	0.22681	0.551928
6	0.173013	0.501169
1	1	1
2	0.611598	0.807026
3	0.533235	0.694143
4	0.521747	0.614052
5	0.51068	0.551928
6	0.51068	0.501169
1	1	1
2	1	0.807026
3	0.60601	0.694143
4	0.326694	0.614052
5	0.326694	0.551928
6	0.326694	0.501169
7	0.326694	0.458254
8	0.178076	0.421078
9	0.178076	0.388287
1	1	1
2	0.646183	0.807026
3	0.499356	0.694143
4	0.379361	0.614052
5	0.210015	0.551928
6	0.172729	0.501169
7	0	0.458254
8	0	0.421078
1	1	1
2	0.821584	0.807026
3	0.133024	0.694143
4	0.00947702	0.614052
5	0.00331881	0.551928
6	0	0.501169
7	0	0.458254
1	1	1
2	0.796558	0.807026
3	0.330893	0.694143
4	0.15169	0.614052
5	0.0539658	0.551928
6	0.0539658	0.501169
1	1	1
2	1	0.807026
3	0.81533	0.694143
4	0.150635	0.614052
5	0.150635	0.551928
1	1	1
2	1	0.807026
3	1	0.694143
4	1	0.614052
5	1	0.551928
1	1	1
2	0.587344	0.807026
3	0.504912	0.694143
4	0.504912	0.614052
5	0.504912	0.551928
1	1	1
2	0.909933	0.807026
3	0.868312	0.694143
4	0.837075	0.614052
5	0.648854	0.551928
1	1	1
2	0.463211	0.807026
3	0.249784	0.694143
4	0.249784	0.614052
5	0.249784	0.551928
1	1	1
2	0.746995	0.807026
3	0.746995	0.694143
4	0.377544	0.614052
5	0.377544	0.551928
1	1	1
2	0.900263	0.807026
3	0.836607	0.694143
4	0.544533	0.614052
5	0.544533	0.551928
1	1	1
2	0.700515	0.807026
3	0	0.694143
4	0	0.614052
1	1	1
2	0.786899	0.807026
3	0.786899	0.694143
4	0.481976	0.614052
1	1	1
2	0.968834	0.807026
3	0.931057	0.694143
4	0.931057	0.614052
1	1	1
2	0.970876	0.807026
3	0.970876	0.694143
4	0.970876	0.614052
1	1	1
2	0.768624	0.807026
3	0.625136	0.694143
4	0.625136	0.614052
1	1	1
2	0.828245	0.807026
3	0.828245	0.694143
4	0.558432	0.614052
1	1	1
2	0.819679	0.807026
3	0.819679	0.694143
4	0.819679	0.614052
1	1	1
2	0	0.807026
3	0	0.694143
1	1	1
2	0.924684	0.807026
3	0.924684	0.694143
1	1	1
2	0.403203	0.807026
3	0.320726	0.694143
1	1	1
2	1	0.807026
3	1	0.694143
1	1	1
2	0.886387	0.807026
1	1	1
2	1	0.807026
1	1	1
2	1	0.807026
3	0.952412	0.694143

## Sheet: McM_Bar
		RMS Err	R
		0.217943	0.463325
		m	R^2
		-0.165392	0.21467
Stage (Normalized)	Preservation %	Fit
1	1	1
2	0.877094	0.885359
3	0.404691	0.818299
4	0.404691	0.770718
5	0.404691	0.733812
6	0.404691	0.703658
7	0.404691	0.678163
8	0.404691	0.656078
9	0.404691	0.636597
10	0.404691	0.619172
1	1	1
2	0.913447	0.885359
3	0.835633	0.818299
4	0.835633	0.770718
5	0.835633	0.733812
6	0.835633	0.703658
7	0.807153	0.678163
8	0.807153	0.656078
1	1	1
2	1	0.885359
3	1	0.818299
4	1	0.770718
5	1	0.733812
6	1	0.703658
7	1	0.678163
8	1	0.656078
1	1	1
2	1	0.885359
3	0.997442	0.818299
4	0.866807	0.770718
5	0.64087	0.733812
6	0.430045	0.703658
7	0.407861	0.678163
8	0.407861	0.656078
9	0.407861	0.636597
1	1	1
2	1	0.885359
3	1	0.818299
4	1	0.770718
5	1	0.733812
6	1	0.703658
7	1	0.678163
8	1	0.656078
1	1	1
2	0.981196	0.885359
3	0.841802	0.818299
4	0.841802	0.770718
5	0.841802	0.733812
6	0.841802	0.703658
7	0.841802	0.678163
8	0.841802	0.656078
1	1	1
2	0.409657	0.885359
3	0.409657	0.818299
1	1	1
2	0.94863	0.885359
3	0.94863	0.818299
4	0.94863	0.770718
5	0.94863	0.733812
1	1	1
2	1	0.885359
3	1	0.818299
4	0.977592	0.770718
5	0.946282	0.733812
6	0.946282	0.703658
1	1	1
2	0.763914	0.885359
3	0.611183	0.818299
4	0.611183	0.770718
5	0.611183	0.733812
1	1	1
2	0.967756	0.885359
3	0.935107	0.818299
4	0.846479	0.770718
1	1	1
2	0.810351	0.885359
3	0.804947	0.818299
4	0.804947	0.770718
1	1	1
2	0.67762	0.885359
3	0.346372	0.818299
4	0.240151	0.770718
5	0.0794156	0.733812
6	0.0794156	0.703658
1	1	1
2	1	0.885359
1	1	1
2	0.806071	0.885359
1	1	1
2	1	0.885359
3	1	0.818299
1	1	1
2	1	0.885359
3	0.784049	0.818299

## Sheet: McM_MB
		RMS Err	R
		0.113899	0.880822
		m	R^2
		-0.267973	0.775848
Stage (Normalized)	Preservation %	Fit
1	1	1
2	0.735668	0.814255
3	0.498384	0.705601
4	0.355987	0.62851
5	0.328481	0.568714
6	0.328481	0.519856
7	0.233273	0.478548
8	0.233273	0.442765
9	0.233273	0.411203
10	0.233273	0.382969
11	0.233273	0.357428
12	0.233273	0.334112
1	1	1
2	0.811971	0.814255
3	0.664845	0.705601
4	0.422953	0.62851
5	0.422953	0.568714
6	0.379819	0.519856
7	0.358228	0.478548
8	0.310004	0.442765
9	0.310004	0.411203
10	0.310004	0.382969
11	0.310004	0.357428
1	1	1
2	0.857835	0.814255
3	0.637987	0.705601
4	0.637987	0.62851
5	0.601812	0.568714
6	0.532706	0.519856
7	0.472304	0.478548
8	0.470808	0.442765
9	0.470808	0.411203
10	0.470808	0.382969
1	1	1
2	0.748586	0.814255
3	0.719267	0.705601
4	0.646144	0.62851
5	0.584119	0.568714
6	0.526242	0.519856
7	0.520152	0.478548
8	0.513344	0.442765
9	0.513344	0.411203
1	1	1
2	0.925619	0.814255
3	0.809986	0.705601
4	0.745499	0.62851
5	0.682087	0.568714
6	0.67216	0.519856
7	0.650411	0.478548
8	0.650411	0.442765
1	1	1
2	0.847146	0.814255
3	0.750582	0.705601
4	0.692682	0.62851
5	0.664759	0.568714
6	0.643762	0.519856
7	0.643762	0.478548
1	1	1
2	0.863176	0.814255
3	0.783196	0.705601
4	0.747473	0.62851
5	0.70946	0.568714
6	0.707464	0.519856
1	1	1
2	0.866827	0.814255
3	0.808042	0.705601
4	0.719876	0.62851
5	0.71407	0.568714
1	1	1
2	0.913301	0.814255
3	0.814268	0.705601
4	0.789548	0.62851
1	1	1
2	0.877526	0.814255
3	0.849662	0.705601
1	1	1
2	0.966789	0.814255
